# Supplementary material for: Catalytic performance of Pd-promoted Cu hydrotalcite-derived catalysts in partial hydrogenation of acetylene: effect of Pd–Cu alloy formation
Source: Royal Society of Chemistry journal article supplement (doi:10.1039/c5cy01516b), 2015-11-19
Supplement: c5cy01516b1.pdf [file c5cy01516b1.pdf]

**Supporting Information for**

**Catalytic performance of Pd promoted Cu hydrotalcite-  
derived catalyst in partial hydrogenation of acetylene: Effect of  
the Pd-Cu alloy formation**

Yanan Liu, Yufei He, Daran Zhou, Junting Feng\*, Dianqing Li

*State Key Laboratory of Chemical Resource Engineering,*

*Beijing University of Chemical Technology,*

*15 Bei San Huan East Road, Beijing 100029, China.*

\* Corresponding author

Address: Box 98, 15 Bei San Huan East Road, Beijing 100029, China

Fax: +86 10 64425385

Tel.: +86 10 64451007

E-mail address: fengjt@mail.buct.edu.cn (J. T. Feng)

## Analysis on morphology and structure of catalyst

The SEM images of Mco-PdCu/MgAl-cHT and I-PdCu/MgAl-cHT are shown in Fig. S1. In Mco-PdCu/MgAl-cHT, the flower-like structure with outer trumpet-like pores is obviously demonstrated. Correspondingly, flake-shaped MgAl-cHT crystallites are observed in I-PdCu/MgAl-cHT. The morphological difference in the crystallites results in the change of surface area of catalysts.

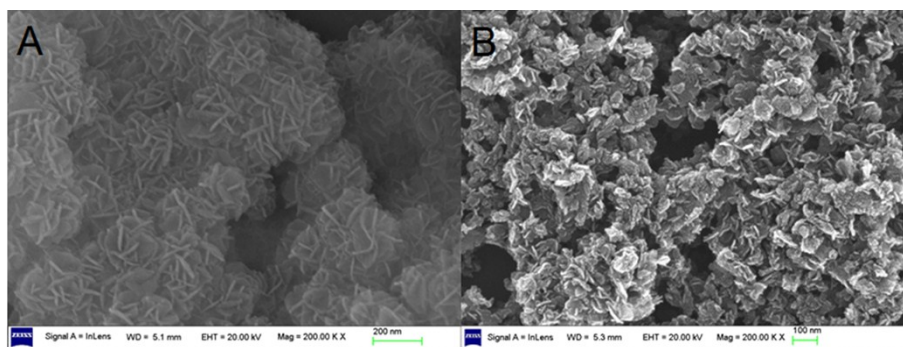

**Fig. S1** The SEM images of (A) Mco-PdCu/MgAl-cHT and (B) I-PdCu/MgAl-cHT

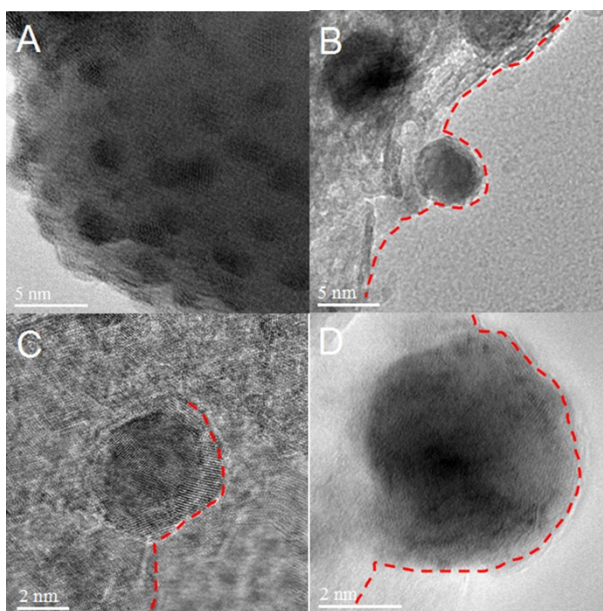

**Fig. S2** HRTEM of Mco-PdCu/MgAl-cHT catalyst.

## The Koros–Nowak test

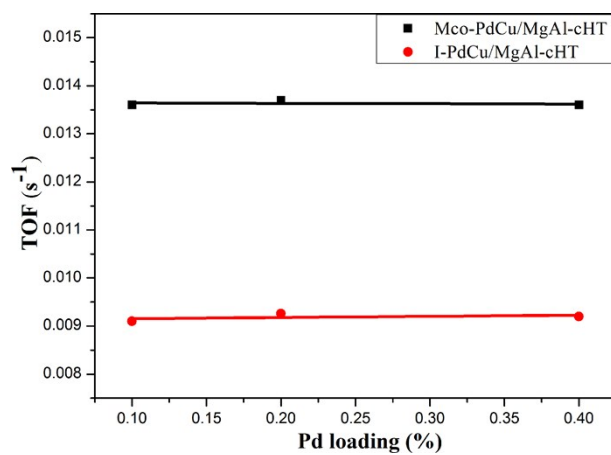

**Fig. S3** Plots of TOF versus Pd loading for different catalysts at 30 °C
